# Supplementary material for: Dengue and COVID-19 Co-Circulation in the Peruvian Amazon: A Population-Based Study
Source: PubMed Central journal article supplement (PMC10540116; doi:10.4269/ajtmh.22-0539), 2023-04-24

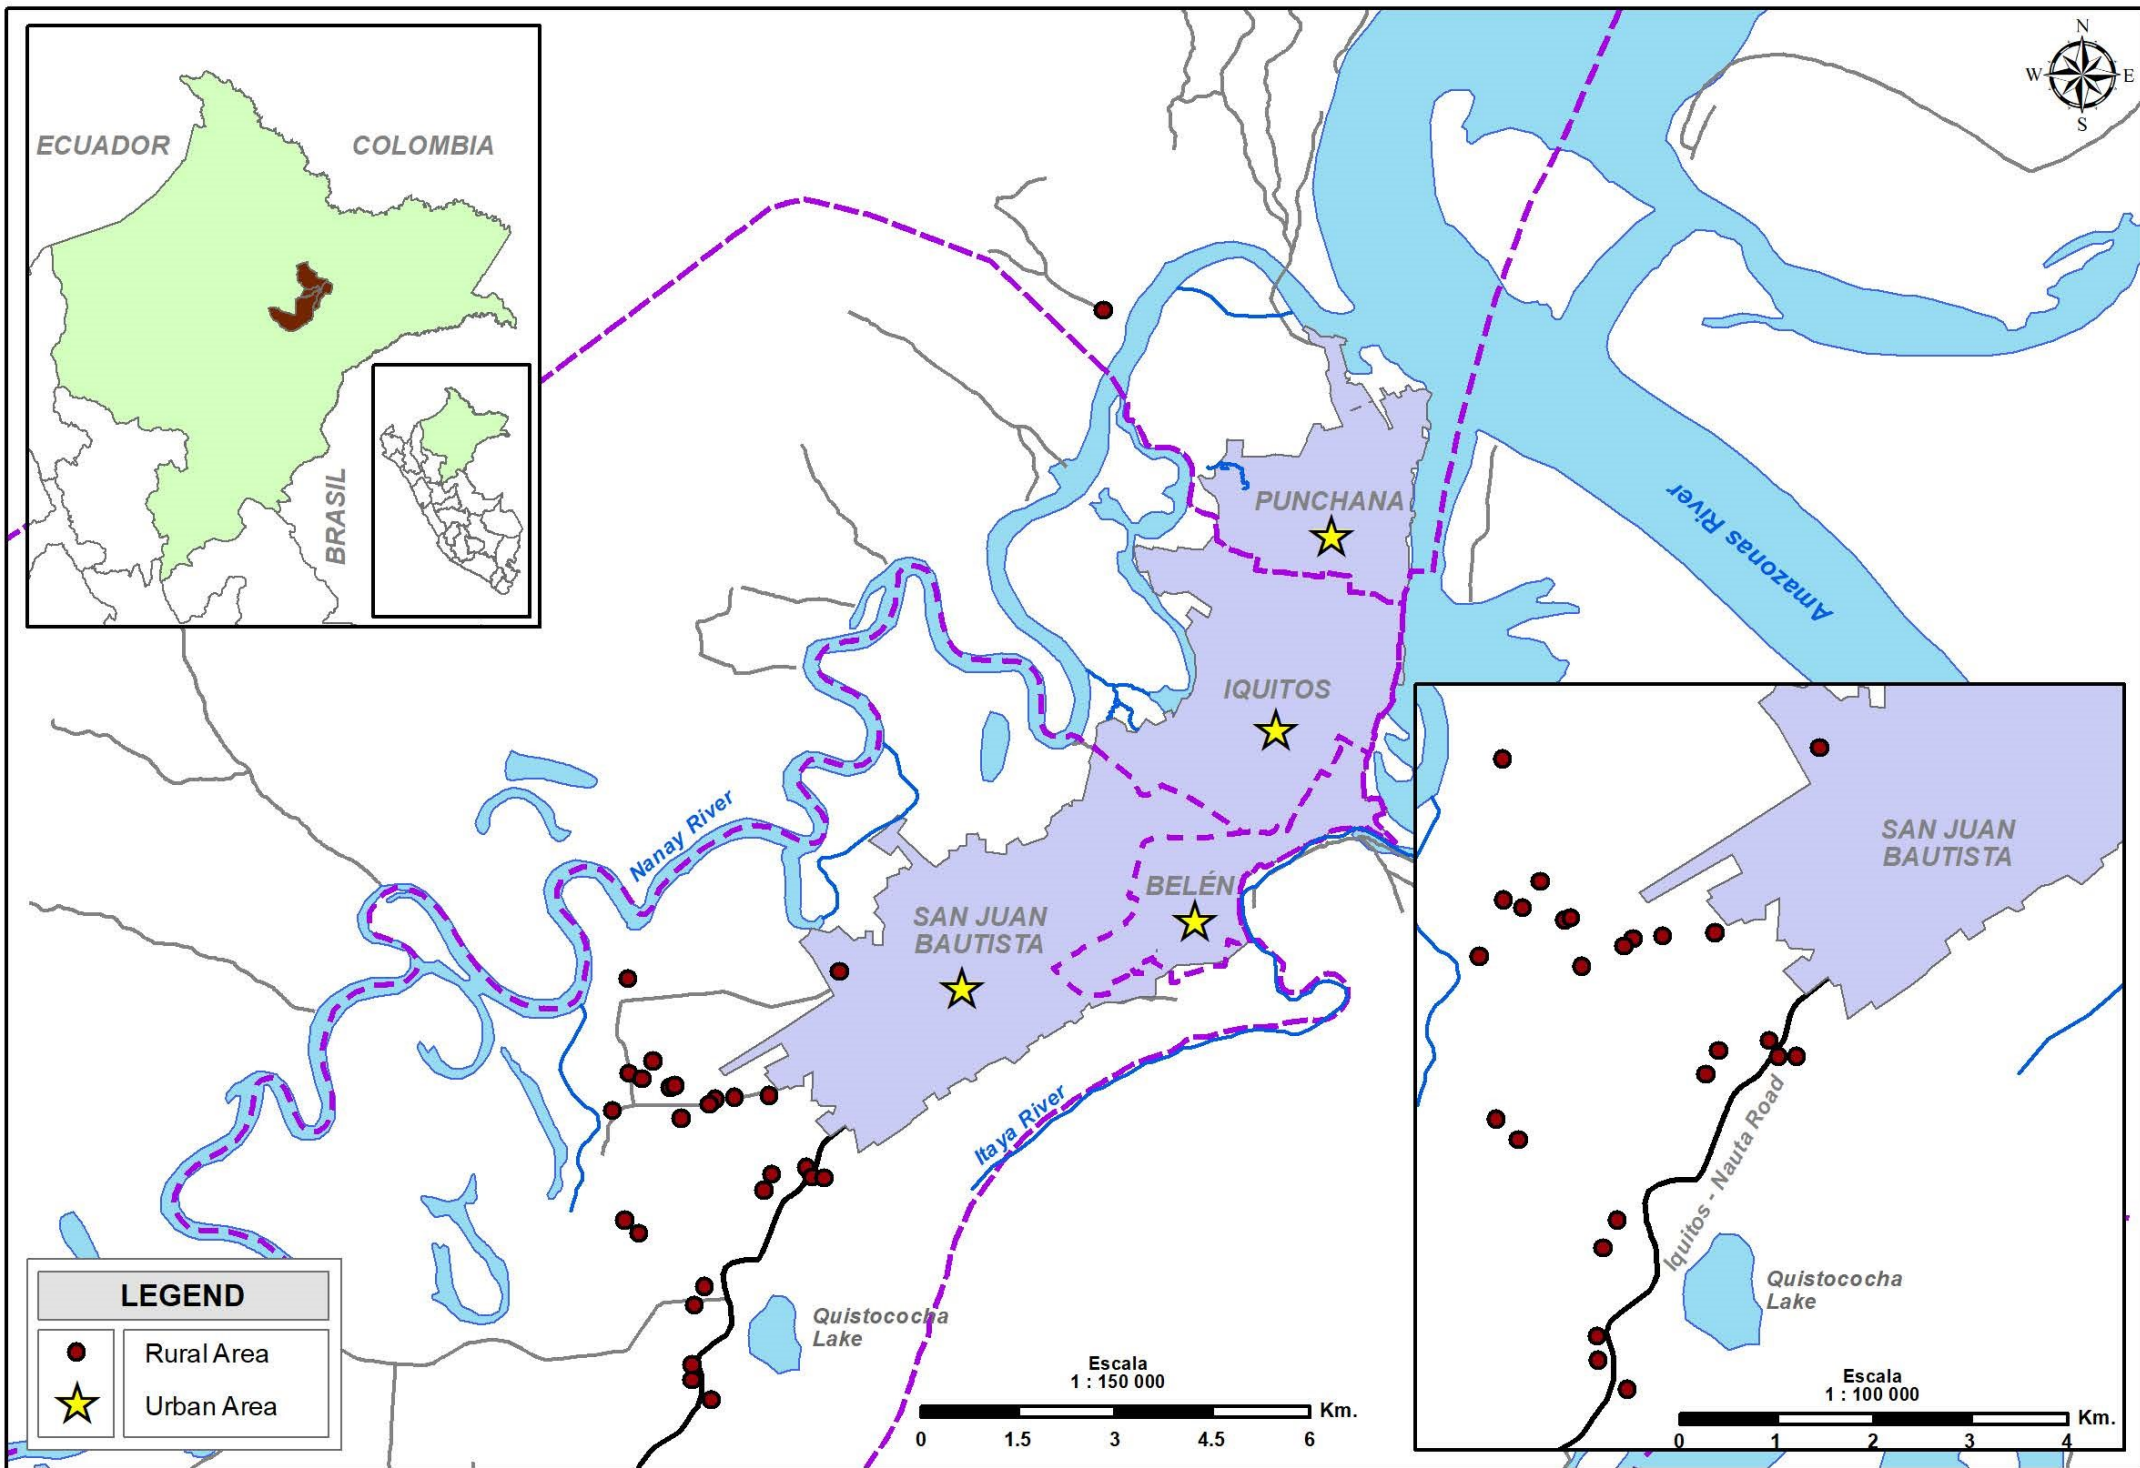

Supplement: tpmd220539.SD1.pdf [file tpmd220539.SD1.pdf]
